# Supplementary material for: Measurement Report: Atmospheric CH 4 at regional stations of the Korea Meteorological Administration/Global Atmosphere Watch Programme: measurement, characteristics and long-term changes of its drivers
Source: Copernicus journal article supplement (doi:10.5194/acp-2022-600), 2022-10-12
Supplement: Supplementary file 2 [file acp-2022-600-supplement.pdf]

## Supplementary

# Atmospheric CH<sub>4</sub> at regional stations of the Korea Meteorological Administration/ Global Atmosphere Watch Programme: measurement, characteristics and long-term changes of its drivers

Haeyoung Lee\*, Won-Ick Seo, Shanlan Li, Soojeong Lee, Samuel Kenea, and Sangwon Joo

National Institute of Meteorological Sciences, Jeju, 63568, Republic of Korea

Correspondence to Haeyoung Lee ([leehy80@korea.kr](mailto:leehy80@korea.kr))

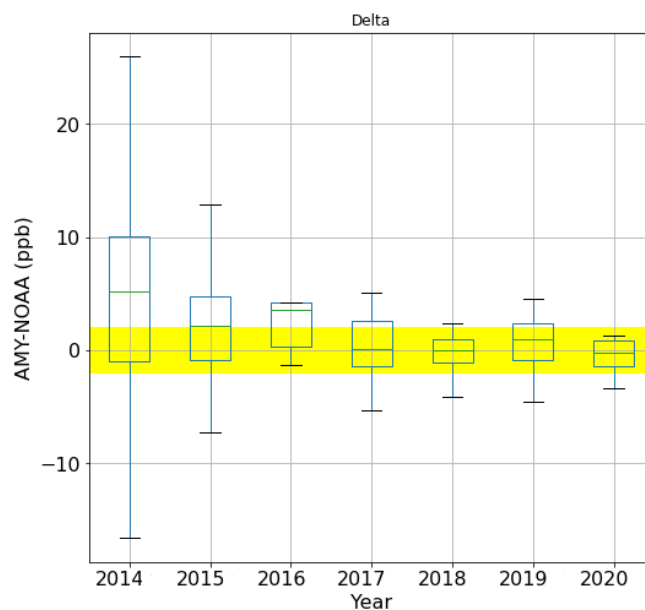

Figure S1. The box plot of CH<sub>4</sub> difference between AMY quasi-continuous hourly data and NOAA weekly flask data. The mean of difference is  $2.2 \pm 11.8$  ppb.

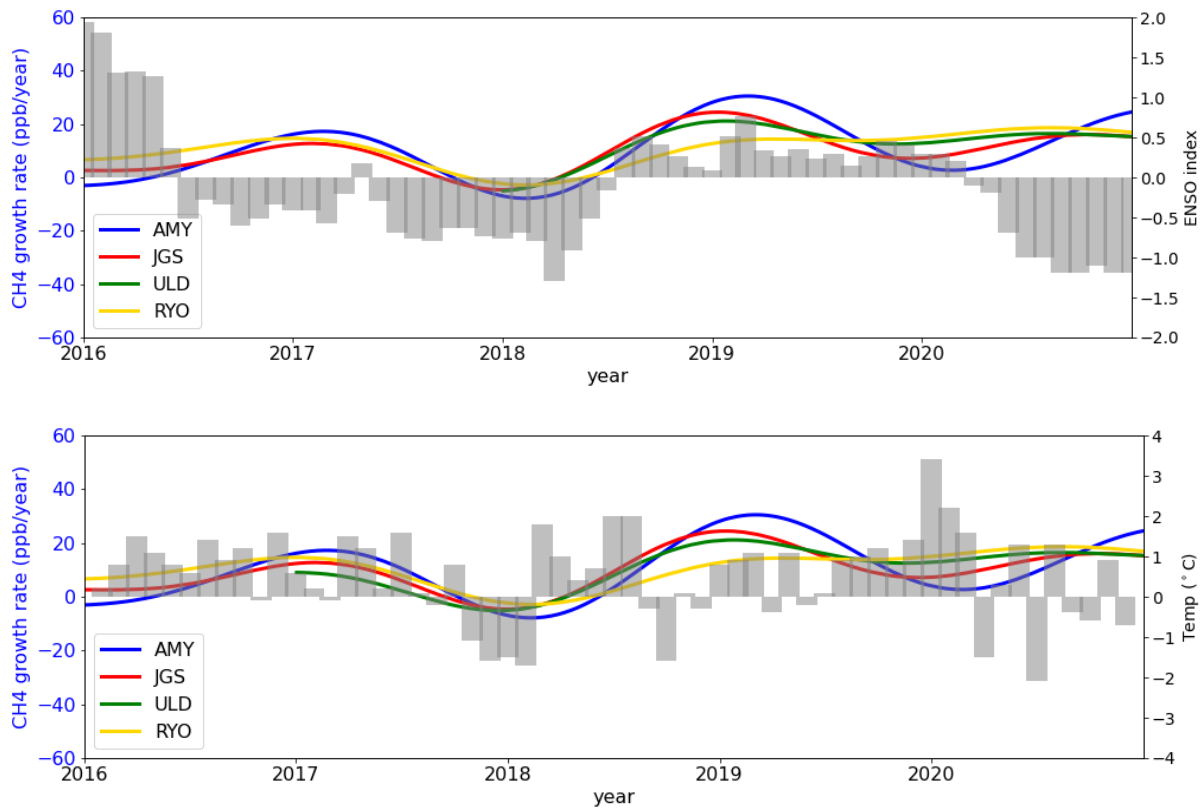

Figure S2. The trend of growth rate and ENSO (upper panel) and Temp ( $^{\circ}\text{C}$ ) (bottom) at four regional stations (AMY, JGS, ULD and RYO). The Temperature data were downloaded from <https://data.kma.go.kr/stcs/grnd> (last access: 23 Aug. 2022). These values are calculated the difference from the mean temperature anomaly.

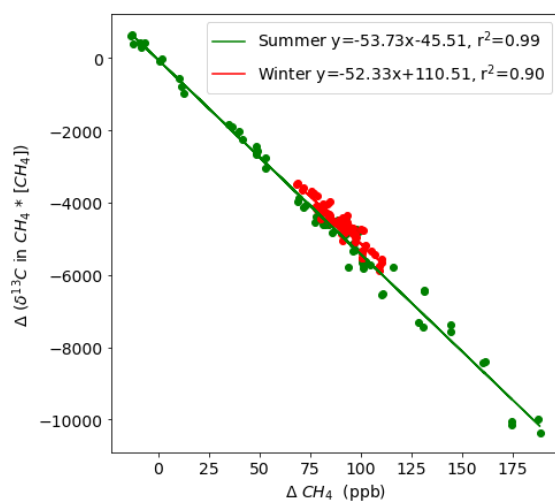

Figure S3. Miller-Tans plots showing the source signature of methane increments (Anmyeondo, AMY) into background air (Mauna-Loa). Collected from AMY station during summer (Jun, July and August, green scatters) and Winter (December, January, and February, red scatters).
